# Supplementary material for: Effects of Administration and Intensity of Statins on Mortality in Patients Undergoing Hemodialysis
Source: MDPI journal article supplement (doi:10.3390/ph17040498), 2024-04-13
Supplement: s1 [file s1]

**Table S1.** Multivariable Cox regression analyses using two variables of Group and one confounding factor.

**Table S2.** Patient clinical characteristics using the balanced cohort.

**Table S3.** Cox regression analyses for patient survival using the balanced cohort.

**Table S4.** Medication types and Health Insurance Review and Assessment Service codes.

**Figure S1.** Propensity score balance assessment using absolute standardized difference plot.

**Figure S2.** Kaplan–Meier curves of patient survival according to groups using the balanced cohort.

**Table S1. Multivariable Cox regression analyses using two variables of group based on intensity of statin and one confounding factor.**

|                                                     | Multivariable    |          |
|-----------------------------------------------------|------------------|----------|
|                                                     | HR (95% CI)      | <i>P</i> |
| <b>Analysis using group + age</b>                   |                  |          |
| Group 2                                             | 0.97 (0.86–1.08) | 0.556    |
| Group 3                                             | 0.95 (0.92–0.98) | <0.001   |
| Group 4                                             | 1.10 (0.96–1.25) | 0.155    |
| <b>Analysis using group + VA type</b>               |                  |          |
| Group 2                                             | 1.14 (1.02–1.28) | 0.023    |
| Group 3                                             | 1.07 (1.04–1.11) | <0.001   |
| Group 4                                             | 1.22 (1.07–1.39) | 0.003    |
| <b>Analysis using group + CCI score</b>             |                  |          |
| Group 2                                             | 0.99 (0.88–1.11) | 0.881    |
| Group 3                                             | 0.96 (0.93–0.99) | 0.006    |
| Group 4                                             | 0.99 (0.87–1.13) | 0.853    |
| <b>Analysis using group + use of RASB</b>           |                  |          |
| Group 2                                             | 1.13 (1.01–1.27) | 0.036    |
| Group 3                                             | 1.07 (1.04–1.11) | <0.001   |
| Group 4                                             | 1.24 (1.09–1.41) | 0.001    |
| <b>Analysis using group + use of clopidogrel</b>    |                  |          |
| Group 2                                             | 1.08 (0.96–1.21) | 0.200    |
| Group 3                                             | 1.00 (0.97–1.04) | 0.847    |
| Group 4                                             | 1.10 (0.97–1.26) | 0.153    |
| <b>Analysis using group + use of aspirin</b>        |                  |          |
| Group 2                                             | 1.12 (0.99–1.25) | 0.063    |
| Group 3                                             | 1.05 (1.02–1.09) | 0.001    |
| Group 4                                             | 1.21 (1.06–1.38) | 0.005    |
| <b>Analysis using group + presence of MI or CHF</b> |                  |          |
| Group 2                                             | 1.10 (0.98–1.24) | 0.105    |
| Group 3                                             | 1.04 (1.01–1.07) | 0.014    |
| Group 4                                             | 1.14 (1.00–1.30) | 0.049    |
| <b>Analysis using group + underlying disease</b>    |                  |          |
| Group 2                                             | 1.06 (0.95–1.19) | 0.294    |
| Group 3                                             | 1.00 (0.97–1.03) | 0.902    |
| Group 4                                             | 1.11 (0.98–1.27) | 0.113    |
| <b>Analysis using group + serum albumin</b>         |                  |          |
| Group 2                                             | 1.09 (0.98–1.23) | 0.125    |
| Group 3                                             | 1.07 (1.04–1.10) | <0.001   |
| Group 4                                             | 1.16 (1.02–1.32) | 0.024    |
| <b>Analysis using group + serum creatinine</b>      |                  |          |

|                                                |                  |        |
|------------------------------------------------|------------------|--------|
| Group 2                                        | 1.04 (0.93–1.17) | 0.511  |
| Group 3                                        | 0.99 (0.96–1.02) | 0.471  |
| Group 4                                        | 1.10 (0.96–1.25) | 0.165  |
| <b>Analysis using group + serum phosphorus</b> |                  |        |
| Group 2                                        | 1.10 (0.98–1.23) | 0.115  |
| Group 3                                        | 1.05 (1.02–1.09) | 0.001  |
| Group 4                                        | 1.17 (1.03–1.33) | 0.018  |
| <b>Analysis using group + DBP</b>              |                  |        |
| Group 2                                        | 1.14 (0.98–0.99) | 0.033  |
| Group 3                                        | 1.10 (1.06–1.14) | <0.001 |
| Group 4                                        | 1.22 (1.06–1.41) | 0.007  |

The reference group was Group 1.

**Abbreviations:** CCI, Charlson comorbidity index; CHF, congestive heart failure; CI, confidence interval; DBP, diastolic blood pressure; HR, hazard ratio; MI, myocardial infarction; RASB, renin-angiotensin system blocker; VA, vascular access

**Table S2. Patient clinical characteristics using the balanced cohort.**

|                                      | <b>Group 1</b><br><b>(n = 52,967)</b> | <b>Group 2</b><br><b>(n = 36,234)</b> | <b>Group 3</b><br><b>(n = 50,524)</b> | <b>Group 4</b><br><b>(n = 32,427)</b> | <b>P</b> |
|--------------------------------------|---------------------------------------|---------------------------------------|---------------------------------------|---------------------------------------|----------|
| Age (years)                          | 60.1 ± 0.1                            | 61.3 ± 0.6                            | 60.6 ± 0.1                            | 60.7 ± 0.8                            | 0.039    |
| Sex (male, %)                        | 31,791 (60.0%)                        | 20,176 (55.7%)                        | 29,421 (58.2%)                        | 18,009 (55.5%)                        | 0.230    |
| Hemodialysis vintage (months)        | 52.3 ± 0.3                            | 43.6 ± 2.2                            | 49.3 ± 0.6                            | 44.3 ± 3.0                            | <0.001   |
| Body mass index (kg/m <sup>2</sup> ) | 22.4 ± 0.0                            | 22.6 ± 0.0                            | 22.5 ± 0.0                            | 22.8 ± 0.0                            | 0.080    |
| Underlying causes of ESRD            |                                       |                                       |                                       |                                       | 0.260    |
| Diabetes mellitus                    | 22,901 (43.2%)                        | 18,029 (49.8%)                        | 22,866 (45.3%)                        | 15,924 (49.1%)                        |          |
| Hypertension                         | 14,118 (26.7%)                        | 8,425 (23.3%)                         | 12,781 (25.3%)                        | 8,553 (26.4%)                         |          |
| Glomerulonephritis                   | 5,549 (10.5%)                         | 3,689 (10.2%)                         | 5,689 (11.3%)                         | 2,575 (7.9%)                          |          |
| Others                               | 4,550 (8.6%)                          | 2,792 (7.7%)                          | 4,146 (8.2%)                          | 1,768 (5.5%)                          |          |
| Unknown                              | 5,849 (11.0%)                         | 3,299 (9.1%)                          | 5,042 (10.0%)                         | 3,607 (11.1%)                         |          |
| CCI score                            | 7.4 ± 0.0                             | 7.7 ± 0.1                             | 7.6 ± 0.0                             | 7.9 ± 0.2                             | 0.012    |
| Follow-up duration (months)          | 61 ± 0                                | 61 ± 1                                | 60 ± 0                                | 58 ± 2                                | 0.638    |
| Type of vascular access              |                                       |                                       |                                       |                                       | 0.446    |
| Arteriovenous fistula                | 45,052 (85.1%)                        | 31,632 (87.3%)                        | 43,247 (85.6%)                        | 27,458 (84.7%)                        |          |
| Arteriovenous graft                  | 7,915 (14.9%)                         | 4,601 (12.7%)                         | 7,275 (14.4%)                         | 4,970 (15.3%)                         |          |
| Kt/V <sub>urea</sub>                 | 1.53 ± 0.00                           | 1.53 ± 0.01                           | 1.54 ± 0.00                           | 1.52 ± 0.02                           | 0.888    |
| Ultrafiltration volume (L/session)   | 2.28 ± 0.01                           | 2.23 ± 0.04                           | 2.24 ± 0.01                           | 2.33 ± 0.05                           | 0.191    |
| Hemoglobin (g/dL)                    | 10.7 ± 0.0                            | 10.7 ± 0.0                            | 10.7 ± 0.0                            | 10.7 ± 0.0                            | 0.121    |
| Serum albumin (g/dL)                 | 3.99 ± 0.00                           | 3.99 ± 0.01                           | 3.99 ± 0.00                           | 3.99 ± 0.02                           | 0.672    |
| Serum phosphorus (mg/dL)             | 5.0 ± 0.0                             | 4.9 ± 0.1                             | 4.9 ± 0.0                             | 5.0 ± 0.0                             | 0.082    |
| Serum calcium (mg/dL)                | 8.9 ± 0.0                             | 8.9 ± 0.0                             | 8.9 ± 0.0                             | 8.9 ± 0.0                             | 0.611    |
| Systolic blood pressure (mmHg)       | 141 ± 0                               | 141 ± 1                               | 141 ± 0                               | 142 ± 1                               | 0.747    |
| Diastolic blood pressure (mmHg)      | 78 ± 0                                | 78 ± 0                                | 78 ± 0                                | 78 ± 1                                | 0.470    |
| Serum creatinine (mg/dL)             | 9.5 ± 0.0                             | 9.4 ± 0.1                             | 9.4 ± 0.0                             | 9.4 ± 0.2                             | 0.227    |
| Use of RASB                          | 16,031 (30.3%)                        | 12,755 (35.2%)                        | 16,320 (32.3%)                        | 12,489 (38.5%)                        | 0.020    |

|                    |                |                |                |                |       |
|--------------------|----------------|----------------|----------------|----------------|-------|
| Use of clopidogrel | 8,311 (15.7%)  | 6,731 (18.6%)  | 8,649 (17.1%)  | 6,830 (21.1%)  | 0.028 |
| Use of aspirin     | 22,264 (42.0%) | 17,127 (47.3%) | 22,350 (44.2%) | 15,786 (48.7%) | 0.070 |
| MI or CHF          | 23,686 (44.7%) | 17,470 (48.2%) | 23,321 (46.2%) | 15,827 (48.8%) | 0.329 |

Data are expressed as mean  $\pm$  standard errors for continuous variables and as numbers (percentages) for categorical variables. *P*-values are tested using one-way analysis of variance and Pearson's  $\chi^2$  test for categorical variables.

**Abbreviations:** Group 1, patients without prescription for statins; Group 2, patients with prescription for low-intensity statins; Group 3, patients with prescription for moderate-intensity statins; Group 4, patients with prescription for high-intensity statins; CCI, Charlson comorbidity index; CHF, congestive heart failure; ESRD, end-stage renal disease; MI, myocardial infarction; RASB, renin-angiotensin system blockers.

**Table S3. Cox regression analyses for patient survival using the balanced cohort.**

|                                                    | Univariate       |          | Multivariable    |          |
|----------------------------------------------------|------------------|----------|------------------|----------|
|                                                    | HR (95% CI)      | <i>P</i> | HR (95% CI)      | <i>P</i> |
| Group                                              |                  |          |                  |          |
| Ref: Group 1                                       |                  |          |                  |          |
| Group 2                                            | 0.95 (0.93–0.97) | <0.001   | 0.95 (0.92–0.97) | <0.001   |
| Group 3                                            | 0.96 (0.94–0.98) | <0.001   | 0.93 (0.91–0.95) | <0.001   |
| Group 4                                            | 1.05 (1.03–1.08) | <0.001   | 1.00 (0.97–1.03) | 0.939    |
| Ref: Group 2                                       |                  |          |                  |          |
| Group 3                                            | 1.02 (0.99–1.04) | 0.182    | 0.98 (0.95–1.00) | 0.107    |
| Group 4                                            | 1.11 (1.08–1.14) | <0.001   | 1.06 (1.02–1.09) | <0.001   |
| Ref: Group 3                                       |                  |          |                  |          |
| Group 4                                            | 1.09 (1.07–1.12) | <0.001   | 1.08 (1.05–1.11) | <0.001   |
| Age (increase per 1 year)                          | 1.06 (1.06–1.06) | <0.001   | 1.06 (1.06–1.06) | <0.001   |
| Sex (ref: male)                                    | 0.82 (0.81–0.83) | <0.001   | 0.78 (0.77–0.80) | <0.001   |
| Body mass index (increase 1 kg/m <sup>2</sup> )    | 0.97 (0.97–0.97) | <0.001   | 0.96 (0.96–0.97) | 0.005    |
| Underlying cause of ESRD (ref: DM)                 | 0.82 (0.82–0.83) | <0.001   | 0.87 (0.86–0.88) | <0.001   |
| Vascular access (ref: arteriovenous fistula)       | 1.34 (1.31–1.36) | <0.001   | 1.16 (1.13–1.18) | <0.001   |
| Hemodialysis vintage (increase per 1 month)        | 1.01 (1.01–1.01) | <0.001   | 1.00 (1.00–1.01) | <0.001   |
| CCI score (increase per 1 score)                   | 1.14 (1.14–1.14) | <0.001   | 1.08 (1.07–1.08) | <0.001   |
| Ultrafiltration volume (increase per 1 kg/session) | 0.92 (0.91–0.92) | <0.001   | 1.06 (1.05–1.07) | <0.001   |
| KtV <sub>urea</sub> (increase per 1 unit)          | 0.91 (0.88–0.94) | <0.001   | 0.66 (0.63–0.69) | <0.001   |
| Hemoglobin (increase per 1 g/dL)                   | 0.87 (0.86–0.88) | <0.001   | 0.93 (0.92–0.94) | <0.001   |
| Serum albumin (increase per 1 g/dL)                | 0.39 (0.38–0.40) | <0.001   | 0.66 (0.64–0.68) | <0.001   |
| Serum creatinine (increase per 1 mg/dL)            | 0.88 (0.87–0.88) | <0.001   | 0.95 (0.95–0.96) | <0.001   |
| Serum phosphorus (increase per 1 mg/dL)            | 0.90 (0.89–0.91) | <0.001   | 1.07 (1.06–1.07) | <0.001   |
| Serum calcium (increase per 1 mg/dL)               | 1.01 (0.99–1.02) | 0.063    | 1.13 (1.12–1.14) | <0.001   |
| Systolic blood pressure (increase per 1 mmHg)      | 1.01 (1.01–1.01) | <0.001   | 1.01 (1.01–1.01) | <0.001   |

|                                                |                  |        |                  |        |
|------------------------------------------------|------------------|--------|------------------|--------|
| Diastolic blood pressure (increase per 1 mmHg) | 0.98 (0.98–0.98) | <0.001 | 0.99 (0.99–0.99) | 0.009  |
| Use of renin angiotensin system blocker        | 1.20 (1.18–1.21) | <0.001 | 1.05 (1.03–1.07) | <0.001 |
| Use of clopidogrel                             | 1.54 (1.51–1.56) | <0.001 | 1.18 (1.15–1.21) | <0.001 |
| Use of aspirin                                 | 1.24 (1.22–1.25) | <0.001 | 1.00 (0.99–1.02) | 0.640  |
| MI or CHF                                      | 1.40 (1.38–1.43) | <0.001 | 1.03 (1.01–1.05) | <0.001 |

Multivariable analysis was adjusted for age, sex, body mass index, underlying cause of ESRD, vascular access, hemodialysis vintage, CCI score, ultrafiltration volume, Kt/V<sub>urea</sub>, hemoglobin, serum albumin, serum creatinine, serum phosphorus, serum calcium, systolic blood pressure, diastolic blood pressure, use of renin–angiotensin system blockers, statin, clopidogrel, and aspirin, MI or CHF, and was performed using enter mode.

**Abbreviations:** Group 1, patients without prescription for statins; Group 2, patients with prescription for low-intensity statins; Group 3, patients with prescription for moderate-intensity statins; Group 4, patients with prescription for high-intensity statins; CCI, Charlson comorbidity index; CHF, congestive heart failure; CI, confidence interval; DM, diabetes mellitus; ESRD, end stage renal disease; HR, hazard ratio; MI, myocardial infarction.

**Table S4. Medication types and Health Insurance Review and Assessment Service codes**

| <b>Medications</b>                                | <b>Codes</b>                                                                                                                                                                                         |
|---------------------------------------------------|------------------------------------------------------------------------------------------------------------------------------------------------------------------------------------------------------|
| <b>Acepril</b>                                    | 104201ATB, 104202ATB                                                                                                                                                                                 |
| <b>Amlodipine</b>                                 | 495901ATB, 459802ACH, 483201ATB, 486501ATB, 107601ATB, 107601ATD, 459801ACH, 459801ATB, 459901ATB, 464601ATB, 470801ATB, 476201ATB, 479701ATB, 483202ATB, 486502ATB, 107602ATB, 107602ATD, 470802ATB |
| <b>Amlodipine+Atorvastatin</b>                    | 614500ATB, 472300ATB472400ATB472500ATB518900ATB                                                                                                                                                      |
| <b>Amlodipine+Losartan+Chlorthalidone</b>         | 662800ATB, 662900ATB, 663000ATB                                                                                                                                                                      |
| <b>Amlodipine+Losartan+Rosuvastatin</b>           | 663900ATB, 664000ATB, 664100ATB, 664200ATB, 664300ATB, 664400ATB                                                                                                                                     |
| <b>Amlodipine+Olmesartan+Rosuvastatin</b>         | 677300ATB, 677400ATB, 677500ATB, 677600ATB                                                                                                                                                           |
| <b>Amlodipine+Rosuvastatin</b>                    | 673900ATB, 674000ATB, 674100ATB                                                                                                                                                                      |
| <b>Amlodipine+Rosuvastatin+Telmisartan</b>        | 671200ATB, 671300ATB, 671400ATB, 671500ATB, 677000ATB, 677100ATB, 671600ATB, 671700ATB                                                                                                               |
| <b>Amlodipine+Telmisartan+Hydrochlorothiazide</b> | 663500ATB, 663600ATB, 663700ATB, 663800ATB                                                                                                                                                           |
| <b>Amosulalol</b>                                 | 107901ATB, 107902ATB                                                                                                                                                                                 |
| <b>Arotinolol</b>                                 | 110202ATB, 110201ATB                                                                                                                                                                                 |
| <b>Atenolol</b>                                   | 483102ATB, 111402ATB, 483101ATB, 111403ATB, 111401ATB                                                                                                                                                |
| <b>Atenolol+Chlorthalidone</b>                    | 262100ATB, 460200ATB                                                                                                                                                                                 |
| <b>Azilsartan</b>                                 | 662401ATB, 662403ATB, 662402ATB                                                                                                                                                                      |
| <b>Azilsartan+Chlorthalidone</b>                  | 673500ATB, 673600ATB                                                                                                                                                                                 |
| <b>Barnidipine</b>                                | 114003ACH, 114001ACH, 114002ACH                                                                                                                                                                      |
| <b>Benidipine</b>                                 | 115101ATB, 115102ATB, 115104ATB, 115103ATB                                                                                                                                                           |
| <b>Betaxolol</b>                                  | 116801ATB, 116803ATB                                                                                                                                                                                 |
| <b>Bevantolol</b>                                 | 117002ATB, 117001ATB                                                                                                                                                                                 |
| <b>Bisoprolol</b>                                 | 117904ATB, 117903ATB, 117902ATB, 117901ATB                                                                                                                                                           |
| <b>Bisoprolol+Hydrochlorothiazide</b>             | 469800ATB, 470000ATB, 469900ATB                                                                                                                                                                      |



|                                        |                                                                                                              |
|----------------------------------------|--------------------------------------------------------------------------------------------------------------|
| <b>Candesartan</b>                     | 122601ATB, 122602ATB, 122603ATB                                                                              |
| <b>Candesartan+Amlodipine</b>          | 652900ATB, 653000ATB, 653100ATB                                                                              |
| <b>Candesartan+Hydrochlorothiazide</b> | 423700ATB                                                                                                    |
| <b>Candesartan+Rosuvastatin</b>        | 661800ATB, 661900ATB, 673700ATB, 662000ATB, 662100ATB                                                        |
| <b>Captopril</b>                       | 122901ATB, 122902ATB, 122903ATB                                                                              |
| <b>Captopril+Hydrochlorothiazide</b>   | 262200ATB, 262300ATB                                                                                         |
| <b>Carteolol</b>                       | 124801ATB                                                                                                    |
| <b>Carvedilol</b>                      | 125005ATB, 125003ATB, 662201ATB, 125008ACR, 125001ATB, 662202ATB, 125007ACR, 125002ATB, 125006ACR, 125004ACR |
| <b>Celiprolol</b>                      | 129101ATB                                                                                                    |
| <b>Cilazapril</b>                      | 133001ATB, 133002ATB, 133003ATB                                                                              |
| <b>Cilnidipine</b>                     | 133102ATB, 133101ATB                                                                                         |
| <b>Clonidine</b>                       | 136505ATR                                                                                                    |
| <b>Diltiazem</b>                       | 145706ATB, 145707ACR, 145707ATR, 145703ACR, 145706ATR, 145707ATB                                             |
| <b>Doxazocin</b>                       | 149101ATB, 149102ATB, 149104ATR, 149103ATB                                                                   |
| <b>Efonidipine</b>                     | 441202ATB, 441201ATB                                                                                         |
| <b>Enalapril</b>                       | 151603ATB, 151601ATB                                                                                         |
| <b>Enalapril+Hydrochlorothiazide</b>   | 453700ATB, 440300ATB                                                                                         |
| <b>Eprosartan</b>                      | 429201ATB                                                                                                    |
| <b>Eprosartan+Hydrochlorothiazide</b>  | 460500ATB                                                                                                    |
| <b>Felodipine</b>                      | 157503ATR, 157501ATR                                                                                         |
| <b>Felodipine+Metoprolol</b>           | 262400ATR                                                                                                    |
| <b>Fimasartan</b>                      | 515203ATB, 515201ATB, 515202ATB                                                                              |
| <b>Fimasartan+Amlodipine</b>           | 651900ATB, 652000ATB, 652700ATB, 652100ATB                                                                   |
| <b>Fimasartan+Hydrochlorothiazide</b>  | 522000ATB, 526800ATB                                                                                         |
| <b>Fimasartan+Rosuvastatin</b>         | 655000ATB, 654900ATB, 654800ATB, 654700ATB, 654600ATB                                                        |
| <b>Fosinopril</b>                      | 163501ATB, 163502ATB                                                                                         |

|                                       |                                                                                        |
|---------------------------------------|----------------------------------------------------------------------------------------|
| <b>Hydralazine</b>                    | 170701ATB                                                                              |
| <b>Imidapril</b>                      | 173402ATB, 173401ATB                                                                   |
| <b>Irbesartan</b>                     | 177301ATB, 177303ATB                                                                   |
| <b>Irbesartan+Atorvastatin</b>        | 524000ATB, 524100ATB, 527100ATB, 527000ATB                                             |
| <b>Irbesartan+Hydrochlorothiazide</b> | 385700ATB, 385800ATB, 553800ATB                                                        |
| <b>Lacidipine</b>                     | 180301ATB, 180302ATB, 180303ATB                                                        |
| <b>Lercanidipine</b>                  | 182001ATB, 182002ATB                                                                   |
| <b>Lisinopril</b>                     | 184501ATB                                                                              |
| <b>Lisinopril+Hydrochlorothiazide</b> | 499200ATB, 499300ATB                                                                   |
| <b>Losartan</b>                       | 185701ATB, 185702ATB                                                                   |
| <b>Losartan+Amlodipine</b>            | 503000ATB, 637400ATB, 513900ATB, 637500ATB, 502700ATB, 637600ATB                       |
| <b>Losartan+Hydrochlorothiazide</b>   | 262500ATB, 486900ATB, 378900ATB                                                        |
| <b>Manidipine</b>                     | 188001ATB, 188002ATB                                                                   |
| <b>Metoprolol</b>                     | 194003ATR, 193802ATB, 262400ATR                                                        |
| <b>Metoprolol+Hydrochlorothiazide</b> | 262600ATB                                                                              |
| <b>Metoprolol+felodipine</b>          | 262400ATR                                                                              |
| <b>Minoxidil</b>                      | 196102ATB                                                                              |
| <b>Nadolol</b>                        | 198301ATB                                                                              |
| <b>Nebivolol</b>                      | 489501ATB, 489502ATB, 489503ATB                                                        |
| <b>Nicardipine</b>                    | 201003ACR, 201002ATB                                                                   |
| <b>Nifedipine</b>                     | 201407ACS, 201405ATR, 528201ATR, 201409ATR, 528202ATR, 201401ACS, 201401ATB, 201408ATR |
| <b>Nimodipine</b>                     | 201901ATB, 356202ATR, 356203ATR, 356201ATB, 356202ATB                                  |
| <b>Nisoldipine</b>                    | 356202ATR                                                                              |
| <b>Olmesartan</b>                     | 468502ATB, 468501ATB, 468503ATB, 520902ATB, 520901ATB                                  |

|                                                  |                                                                                                                                                                                           |
|--------------------------------------------------|-------------------------------------------------------------------------------------------------------------------------------------------------------------------------------------------|
| <b>Olmesartan+Amlodipine</b>                     | 547800ATB, 632800ATB, 500500ATB, 547700ATB, 629500ATB, 631300ATB, 500600ATB, 547900ATB, 632900ATB, 547600ATB, 548000ATB, 582200ATB, 629600ATB, 633000ATB, 547500ATB, 582400ATB, 629400ATB |
| <b>Olmesartan+Amlodipine+Hydrochlorothiazide</b> | 519800ATB, 519700ATB, 520100ATB, 520000ATB, 519900ATB                                                                                                                                     |
| <b>Olmesartan+Hydrochlorothiazide</b>            | 513600ATB, 489100ATB                                                                                                                                                                      |
| <b>Olmesartan+Rosuvastatin</b>                   | 644200ATB, 644100ATB, 526900ATB, 526300ATB, 526400ATB, 653200ATB, 526500ATB                                                                                                               |
| <b>Perindopril</b>                               | 211301ATB, 501601ATB, 211302ATB, 501602ATB                                                                                                                                                |
| <b>Perindopril+Indapamide</b>                    | 556200ATB                                                                                                                                                                                 |
| <b>Propranolol</b>                               | 219901ATB, 219904ATB, 219906ACR, 219905ACR                                                                                                                                                |
| <b>Quinapril</b>                                 | 221901ATB                                                                                                                                                                                 |
| <b>Ramipril</b>                                  | 222401ATB, 222402ATB, 222404ATB                                                                                                                                                           |
| <b>Ramipril+Felodipine</b>                       | 447100ATB, 447200ATB                                                                                                                                                                      |
| <b>Ramipril+Hydrochlorothiazide</b>              | 448600ATB, 448700ATB                                                                                                                                                                      |
| <b>Telmisartan</b>                               | 378801ATB, 378802ATB, 378803ATB                                                                                                                                                           |
| <b>Telmisartan+Amlodipine</b>                    | 521200ATB, 511600ATB, 521300ATB, 511700ATB, 521400ATB, 511500ATB, 644800ATB, 623100ATB                                                                                                    |
| <b>Telmisartan+Hydrochlorothiazide</b>           | 443200ATB, 443300ATB, 502600ATB                                                                                                                                                           |
| <b>Telmisartan+Rosuvastatin</b>                  | 631600ATB, 629900ATB, 630000ATB, 631700ATB, 630100ATB, 630200ATB                                                                                                                          |
| <b>Temocapril</b>                                | 235002ATB                                                                                                                                                                                 |
| <b>Terazosin</b>                                 | 235501ATB, 235502ATB, 235503ATB, 616501ATB                                                                                                                                                |
| <b>Valsartan</b>                                 | 247103ATB, 247101ATB, 247102ATB, 247104ATB                                                                                                                                                |
| <b>Valsartan+Amlodipine</b>                      | 522600ATB, 492900ATB, 522900ATB, 523200ATB, 522700ATB, 492800ATB, 522800ATB, 523000ATB, 523300ATB, 495800ATB, 523100ATB, 523400ATB                                                        |
| <b>Valsartan+Hydrochlorothiazide</b>             | 356400ATB, 442600ATB                                                                                                                                                                      |
| <b>Valsartan+Lercanidipine</b>                   | 522200ATB, 522300ATB, 522400ATB                                                                                                                                                           |
| <b>Valsartan+Pitavastatin</b>                    | 635000ATB, 635200ATB, 634900ATB, 635100ATB                                                                                                                                                |

|                                           |                                                                                                              |
|-------------------------------------------|--------------------------------------------------------------------------------------------------------------|
| <b>Valsartan+Rosuvastatin</b>             | 629700ATB, 525000ATB, 525200ATB, 629800ATB, 525100ATB, 525300ATB                                             |
| <b>Valsartan+Sacubitril</b>               | 651401ATB, 651402ATB, 651403ATB                                                                              |
| <b>Verapamil</b>                          | 247606ATB, 247607ATB, 247603ATR, 247605ATR, 247601ACR                                                        |
| <b>Zofenopril</b>                         | 510401ATB, 510402ATB, 510403ATB                                                                              |
| <b>Atorvastatin+Amlodipine</b>            | 472300ATB, 472400ATB                                                                                         |
| <b>Atorvastatin+Ezetimibe</b>             | 633800ATB, 633900ATB, 634800ATB                                                                              |
| <b>Pitavastatin+Fenofibrate</b>           | 679300ACH                                                                                                    |
| <b>Rosuvastatin+Ezetimibe</b>             | 640700ATB, 640800ATB, 640900ATB                                                                              |
| <b>Rosuvastatin+Ezetimibe+Telmisartan</b> | 671400ATB, 671500ATB, 671700ATB                                                                              |
| <b>Aspirin</b>                            | 110701ATB, 110702ATB, 110801ATB, 110802ATB, 111001ACE, 111001ATB, 111001ATE, 111002ATE, 111003ACE, 111003ATE |
| <b>Clopidogrel</b>                        | 133201ACR, 133201ATB, 133201ATR, 133202ATB, 133203ATR, 506100ATB                                             |
| <b>Cilostazol</b>                         | 136901ATB, 492501ATB, 495201ATB, 498801ATB, 501501ATB                                                        |
| <b>Ticlopidine</b>                        | 498900ATB, 239201ATB, 239202ATB                                                                              |
| <b>Aspirin+Bethocarbamol</b>              | 256800ATB                                                                                                    |
| <b>Aspirin+Clopidogrel</b>                | 517900ACH, 517900ACE, 517900ATE, 667500ACE                                                                   |
| <b>Aspirin+Dipyridamole</b>               | 489700ACR                                                                                                    |
| <b>Atorvastatin 10mg</b>                  | 111501ATB, 502201ATB, 633800ATB, 472300ATB, 524000ATB, 527100ATB, 614500ATB, 671800ATR, 671900ATR, 673800ATR |
| <b>Atorvastatin 20mg</b>                  | 111502ATB, 502202ATB, 633900ATB, 472400ATB, 518900ATB, 524100ATB, 527000ATB, 672000ATR, 672100ATR            |
| <b>Atorvastatin 40mg</b>                  | 111503ATB, 502203ATB, 634800ATB, 472500ATB,                                                                  |
| <b>Atorvastatin 80mg</b>                  | 111504ATB, 502204ATB                                                                                         |
| <b>Fluvastatin 20mg</b>                   | 162401ACH                                                                                                    |
| <b>Fluvastatin 40mg</b>                   | 162402ACH                                                                                                    |
| <b>Fluvastatin 80mg</b>                   | 162403ATR                                                                                                    |
| <b>Lovastatin 20mg</b>                    | 185801ATB                                                                                                    |

|                          |                                                                                                                                                                                                                                                              |
|--------------------------|--------------------------------------------------------------------------------------------------------------------------------------------------------------------------------------------------------------------------------------------------------------|
| <b>Pitavastatin 1mg</b>  | 470902ATB                                                                                                                                                                                                                                                    |
| <b>Pitavastatin 2mg</b>  | 470901ATB, 634900ATB, 635000ATB                                                                                                                                                                                                                              |
| <b>Pitavastatin 4mg</b>  | 470903ATB, 635100ATB, 635200ATB                                                                                                                                                                                                                              |
| <b>Pravastatin 5mg</b>   | 216602ATB                                                                                                                                                                                                                                                    |
| <b>Pravastatin 10mg</b>  | 216601ATB                                                                                                                                                                                                                                                    |
| <b>Pravastatin 20mg</b>  | 216603ATB                                                                                                                                                                                                                                                    |
| <b>Pravastatin 40mg</b>  | 216604ATB, 519300ACH                                                                                                                                                                                                                                         |
| <b>Rosuvastatin 5mg</b>  | 454003ATB, 640700ATB, 663400ACS, 526900ATB, 629700ATB, 629800ATB, 631600ATB, 631700ATB, 644200ATB, 654800ATB, 655000ATB, 661800ATB, 663900ATB, 664200ATB, 671200ATB, 671300ATB, 664600ATB, 631600ATB, 631700ATB, 673700ATB, 673900ATB, 672500ATR, 672600ATR, |
| <b>Rosuvastatin 10mg</b> | 454001ATB, 640800ATB, 525000ATB, 525100ATB, 526300ATB, 629900ATB, 630100ATB, 644100ATB, 653200ATB, 654700ATB, 654900ATB, 661900ATB, 662000ATB, 664000ATB, 664300ATB, 671400ATB, 671500ATB, 671600ATB, 664700ATB, 674000ATB, 672700ATR, 672800ATR             |
| <b>Rosuvastatin 20mg</b> | 454002ATB, 640900ATB, 525200ATB, 525300ATB, 526400ATB, 526500ATB, 630000ATB, 630200ATB, 654600ATB, 622100ATB, 664100ATB, 664400ATB, 671700ATB, 664800ATB, 674100ATB, 672900ATR, 673000ATR                                                                    |
| <b>Simvastatin 5mg</b>   | 227806ATB                                                                                                                                                                                                                                                    |
| <b>Simvastatin 10mg</b>  | 471000ATB, 227803ATB,                                                                                                                                                                                                                                        |
| <b>Simvastatin 20mg</b>  | 227801ATB, 227801ATR, 471100ATB, 631400ATB,                                                                                                                                                                                                                  |
| <b>Simvastatin 40mg</b>  | 227802ATB, 507800ATB, 631500ATB                                                                                                                                                                                                                              |
| <b>Simvastatin 80mg</b>  | 227805ATB                                                                                                                                                                                                                                                    |

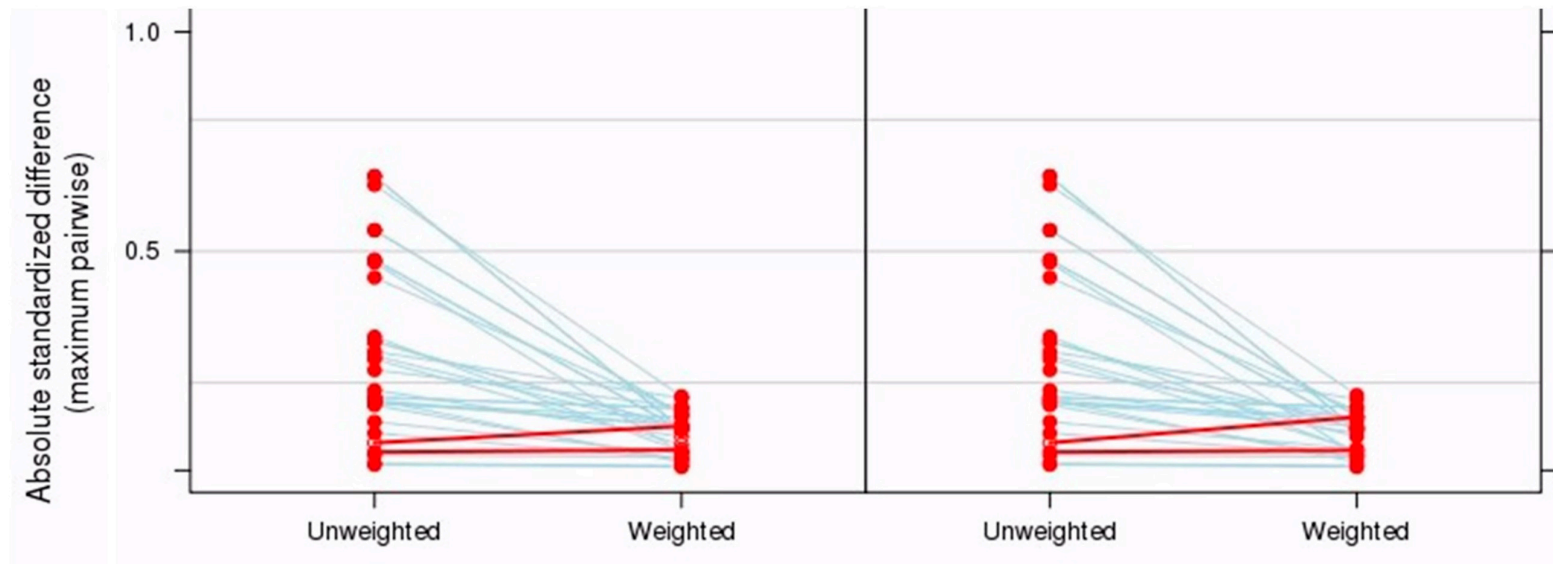

**Figure S1. Propensity score balance assessment using absolute standardized difference plot.** Left: effect size. Right: Kolmogorov–Smirnov statistics.

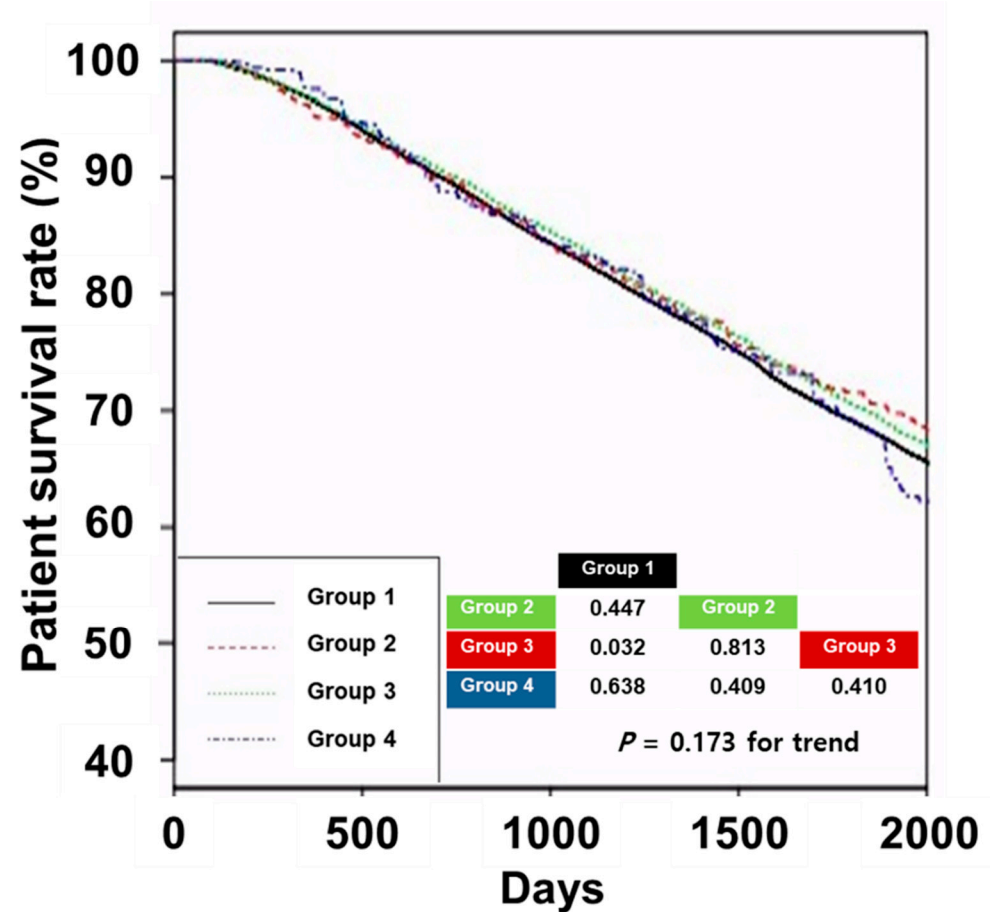

**Figure S2. Kaplan–Meier curves of patient survival according to groups using the balanced cohort.** The 5-year survival rates in Groups 1, 2, 3, and 4 were 68.7%, 71.5%, 70.2%, and 68.5%, respectively. The  $P$ -values for pairwise comparison or trend with log-rank tests were added to the lower right corner of the graph.
